# Supplementary material
Source: PubMed Central journal article supplement (PMC7274873)
Supplement: NIHMS1065821-supplement-supp_info.pdf [file NIHMS1065821-supplement-supp_info.pdf]

## Supporting Information

## Influence of fiber stiffness on meniscal cell migration into dense fibrous networks

*Kwang Hoon Song, Su-Jin Heo, Ana P. Peredo, Matthew D. Davidson, Robert L. Mauck, Jason A. Burdick*

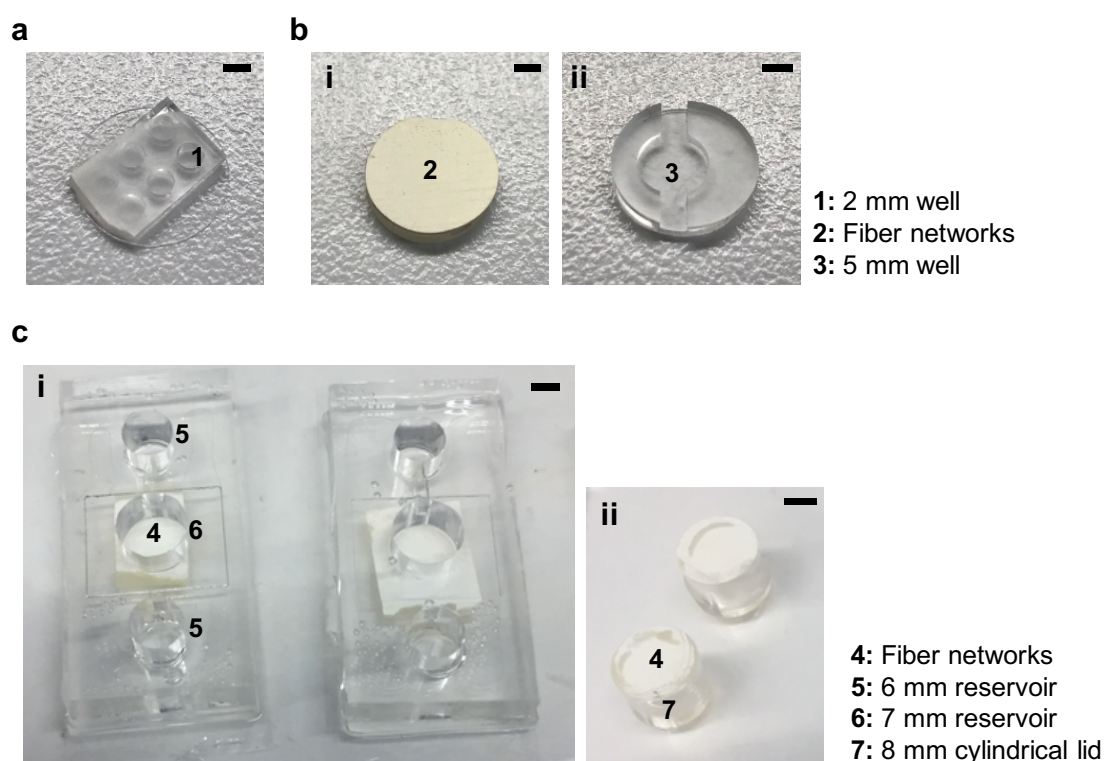

**Figure S1.** Images of polydimethylsiloxane (PDMS) wells and cell migration chambers used throughout the experiments. (a) 2 mm PDMS wells with thin layer of fibrous networks. Scale bar is 2 mm. (b) A 5 mm PDMS well (i) with or (ii) without a thick fibrous network layer. The PDMS well contains a ditch to avoid entrapping air. Scale bars are 2 mm. (c) Cell migration chambers consisting of (i) bottom and (ii) top parts with a thick fibrous network layer. Enclosing sliced tissues with fibrous networks (#4) at the 7 mm reservoir (#6) and 8 mm lid (#7) allowed cell migration through fibers. Two 6 mm reservoirs (#5) at the bottom are connected via a 2 mm width channel to provide media to cells. Scale bars are 4 mm.

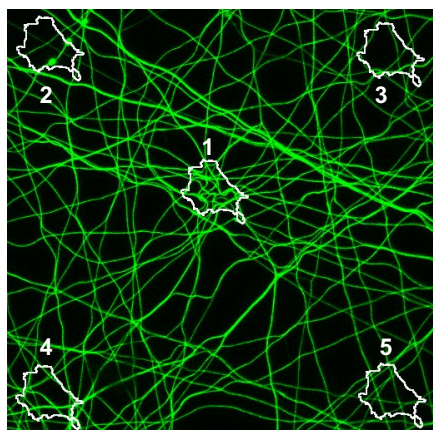

Normalized fiber intensity:

$$\frac{\text{Fluorescence signal of cellular region (1)}}{\text{Average of fluorescence signal of acellular regions (2, 3, 4, 5)}}$$

**Figure S2.** Analysis of fiber density in the cellular region. Fluorescence signal of cellular region (#1) was normalized by the average of the fluorescence signals of 4 different acellular regions (#2, #3, #4, #5). The area of the cellular region (outline of a cell, white) was used to set the sizes of acellular regions at the corners of each image.

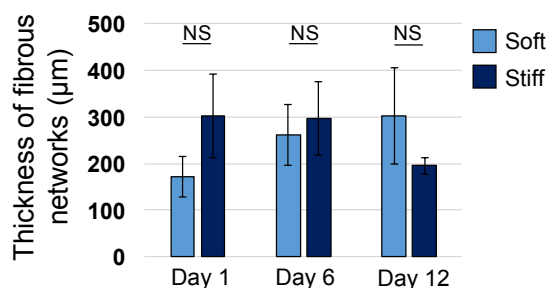

**Figure S3.** Quantification of the thickness of fibrous networks used for MFC migration assay within cell migration chambers. Fluorescent images of cryo-sectioned fibrous networks were analyzed to obtain thicknesses of fibrous networks. Two-way ANOVA with Tukey’s post hoc testing. NS: not significant.  $n = 5$  tissue constructs.

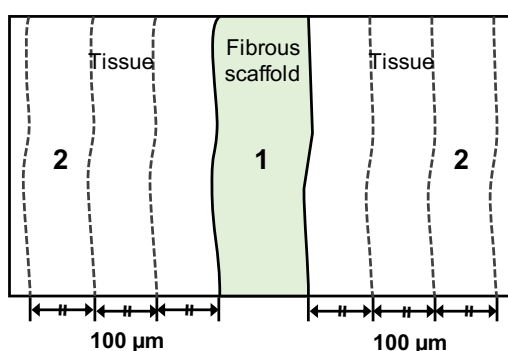

Normalized cell density:

$$\frac{\text{\# of cells at region 1}}{\text{\# of cells at region 2}}$$

Normalized collagen intensity:

$$\frac{\text{Intensity at region 1}}{\text{Intensity at region 2}}$$

**Figure S4.** Analysis of cell density and collagen type I and II deposition. To analyze cell density and collagen deposition, the number of cells and collagen intensity at the fibrous scaffold (region #1) were normalized by the number of cells and collagen intensity at region #2 (200 µm away from the fibrous scaffold).

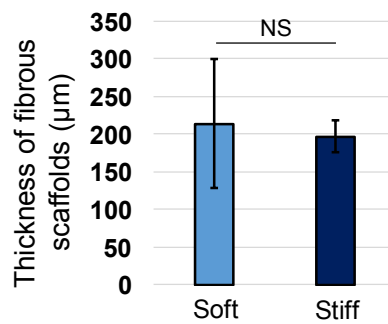

**Figure S5.** Quantification of the thickness of fibrous scaffolds after 4 weeks of implantation. Fluorescent images of sectioned fibrous scaffolds were analyzed to obtain the thicknesses of fibrous scaffolds. Unpaired t-tests. NS: not significant.  $n = 6$  tissue constructs.
